# Supplementary material for: Anchoring a Pt-based alloy on oxygen-vacancy-defected MXene nanosheets for efficient hydrogen evolution reaction and oxygen reduction reaction
Source: Royal Society of Chemistry journal article supplement (doi:10.1039/d3nr04071b), 2023-01-01
Supplement: d3nr04071b1.pdf [file d3nr04071b1.pdf]

## Supplementary Information

### **Anchoring Pt-based alloy on the oxygen-vacancy-defected MXene nanosheet for efficient hydrogen evolution reaction and oxygen reduction reaction**

Qin Zhao<sup>a</sup>, Yu Zhang<sup>a</sup>, Changwang Ke<sup>a</sup>, Xiaofei Yang<sup>a</sup>, Weiping Xiao<sup>a,b\*</sup>

<sup>a</sup> College of Science, Institute of Materials Physics and Chemistry, Nanjing Forestry  
University, Nanjing 210037, China

<sup>b</sup> Key Laboratory of Advanced Energy Materials Chemistry (Ministry of Education),  
College of Chemistry, Nankai University, Tianjin 300071, China

\*Corresponding author

E-mail address: [wp Xiao@njfu.edu.cn](mailto:wp Xiao@njfu.edu.cn)

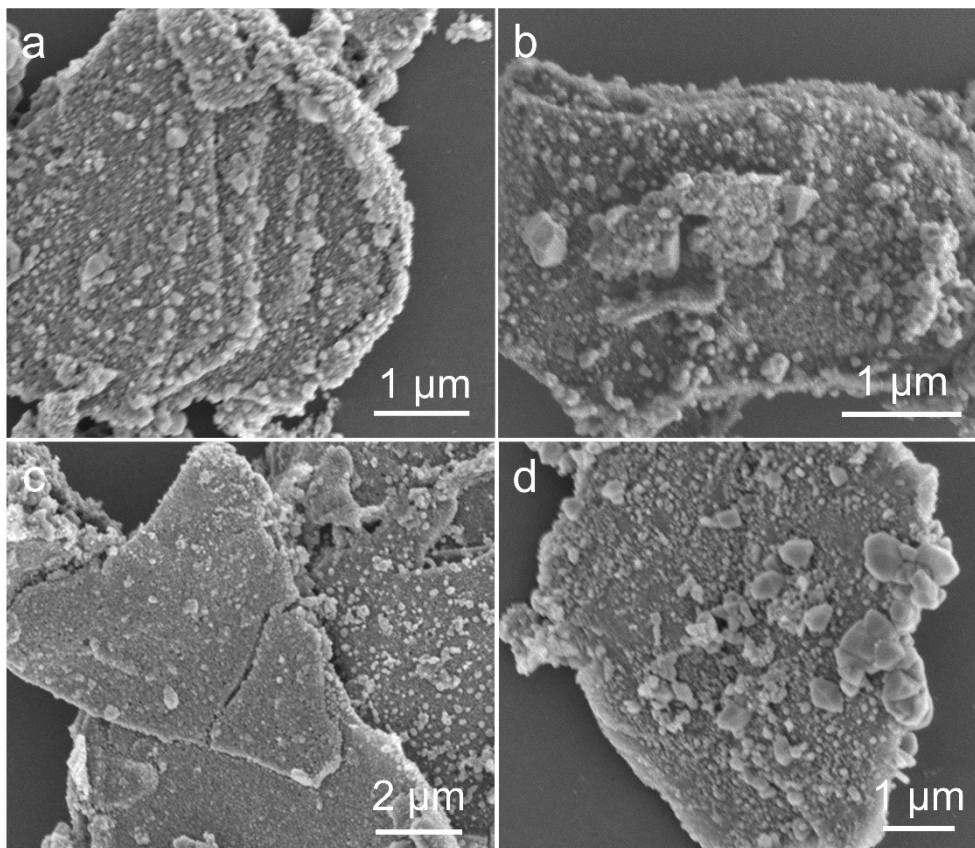

**Fig. S1** SEM images of (a) Pt<sub>3</sub>Ni/MXene-500, (b) Pt<sub>3</sub>Ni/MXene-900, (c) Pt<sub>3</sub>Co/MXene-500, (d) Pt<sub>3</sub>Co/MXene-900.

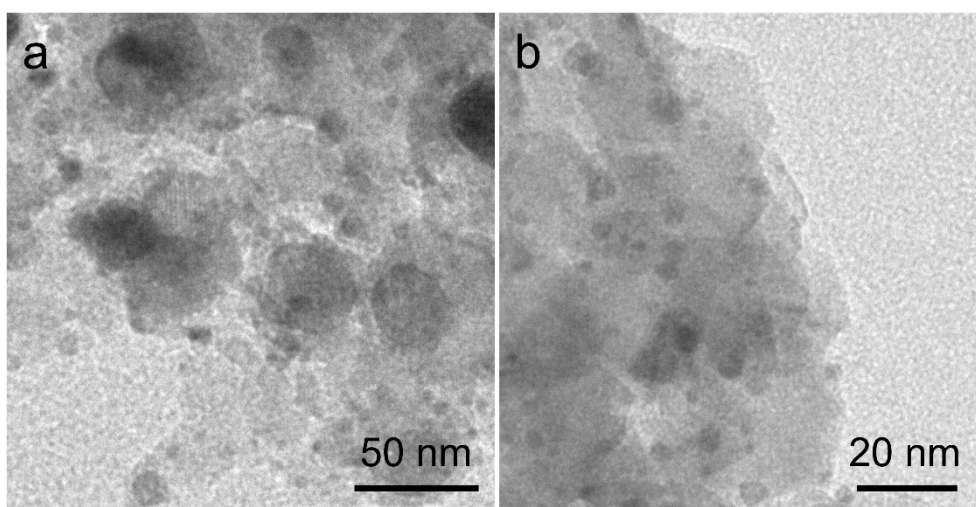

**Fig. S2** TEM images of Pt<sub>3</sub>Ni/MXene-700.

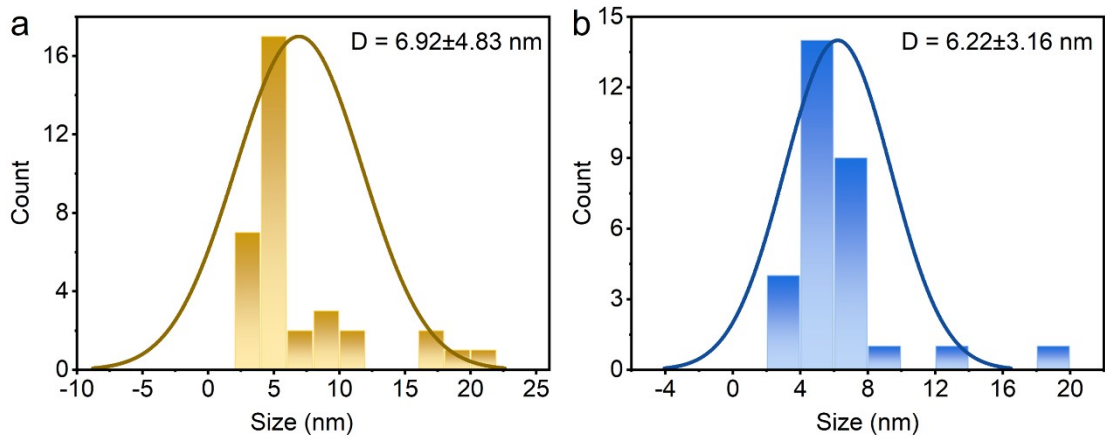

**Fig. S3** Particle size distribution of Pt<sub>3</sub>Ni/MXene-700 and Pt<sub>3</sub>Co/MXene-700 catalyst.

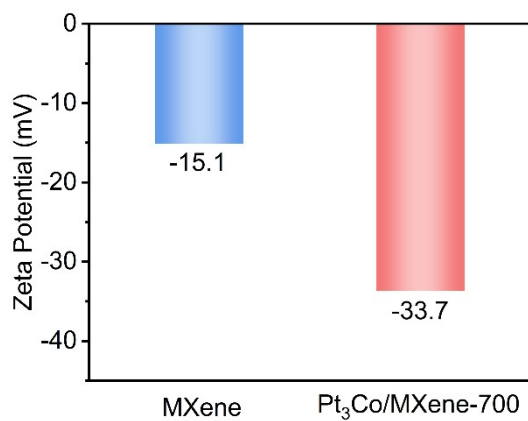

**Fig. S4** The zeta potentials of MXene and Pt<sub>3</sub>Co/MXene-700.

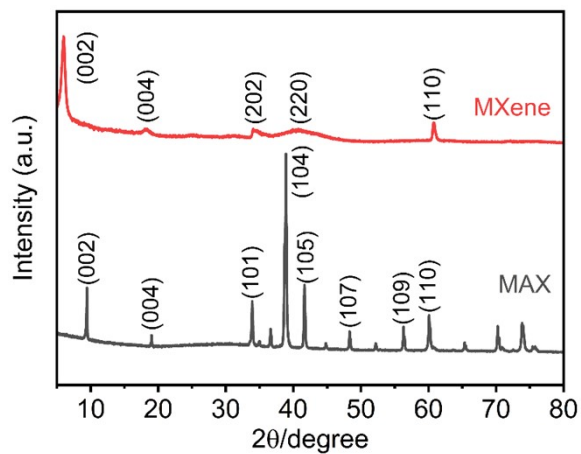

**Fig. S5** XRD patterns of MAX and MXene.

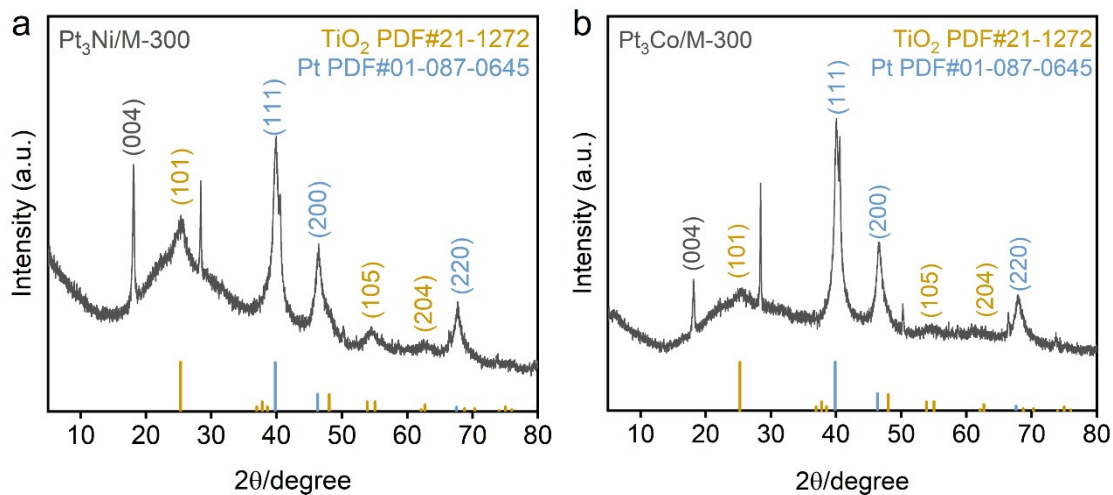

**Fig. S6** XRD patterns of (a) Pt<sub>3</sub>Ni/MXene-300 and (b) Pt<sub>3</sub>Co/MXene-300.

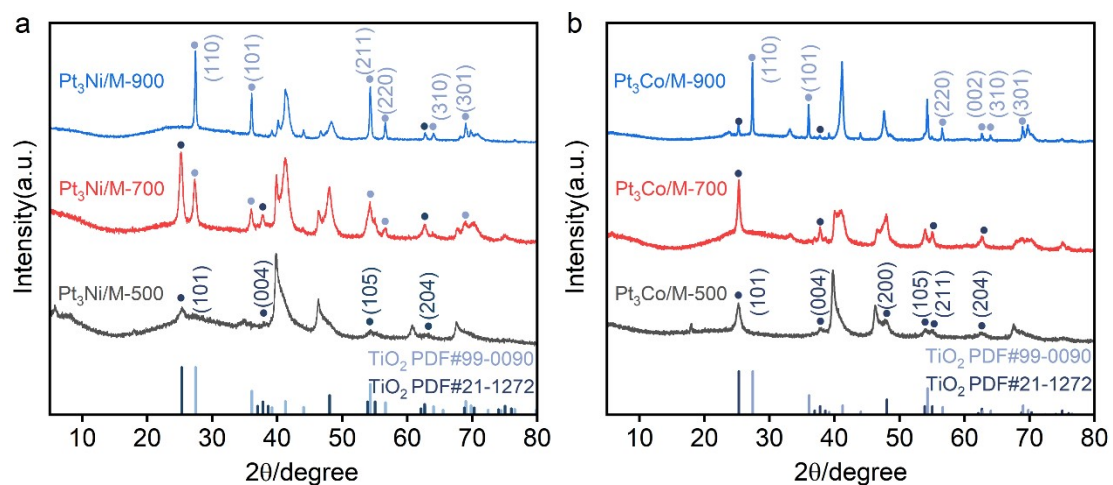

**Fig. S7** (a) XRD patterns of Pt<sub>3</sub>Ni/MXene-500, 700, 900 catalysts; (b) XRD patterns of Pt<sub>3</sub>Co/MXene-500, 700, 900 catalysts.

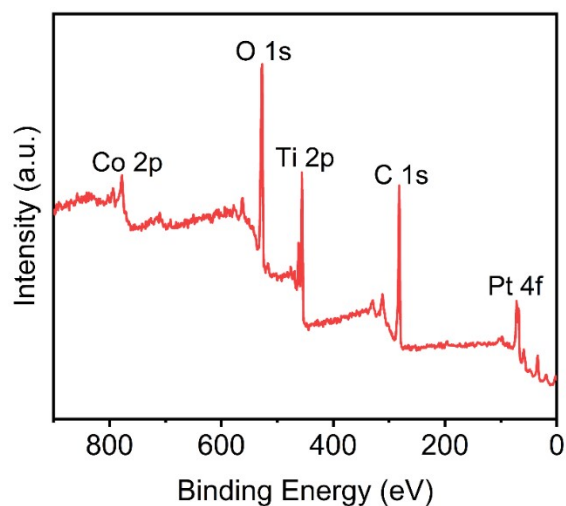

**Fig. S8** XPS survey spectra of Pt<sub>3</sub>Co/MXene-700 catalyst.

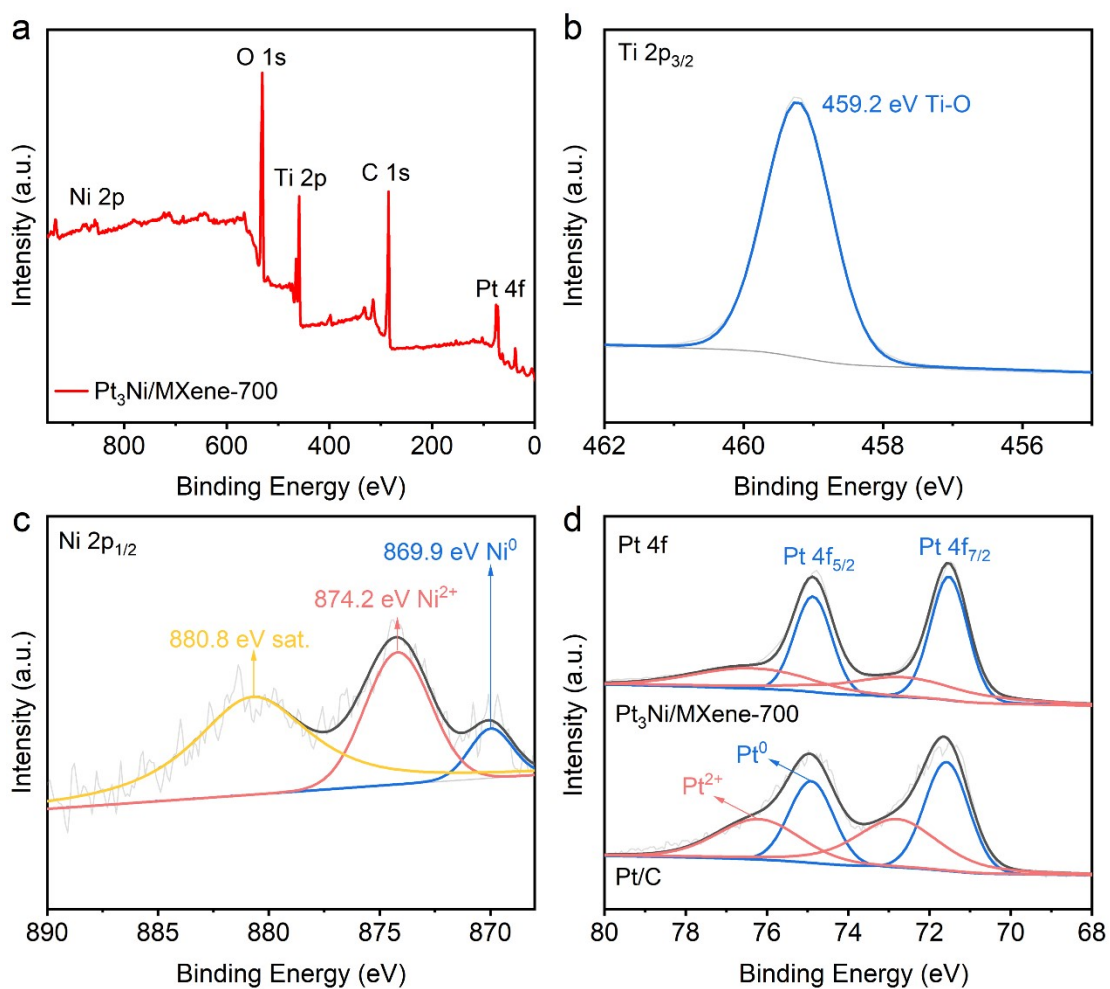

**Fig. S9** (a) XPS survey spectra of Pt<sub>3</sub>Ni/MXene-700. High-resolution XPS spectra of (b) Ti 2p, (c) Ni 2p and (d) Pt 4f of Pt<sub>3</sub>Ni/MXene-700 catalyst.

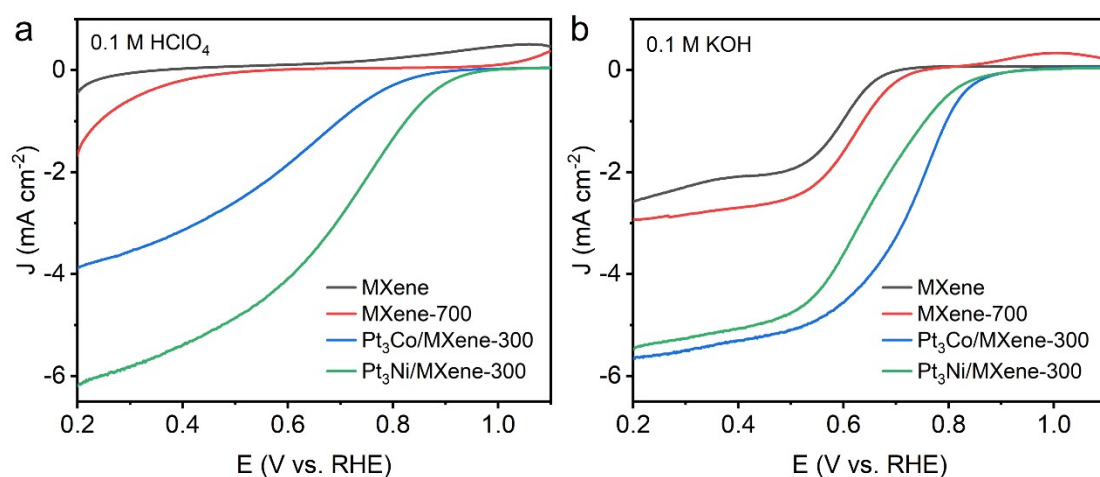

**Fig. S10** The ORR performance of MXene, MXene-700, Pt<sub>3</sub>M/MXene-300 (M = Co, Ni) in (a) 0.1 M HClO<sub>4</sub> and (b) 0.1 M KOH.

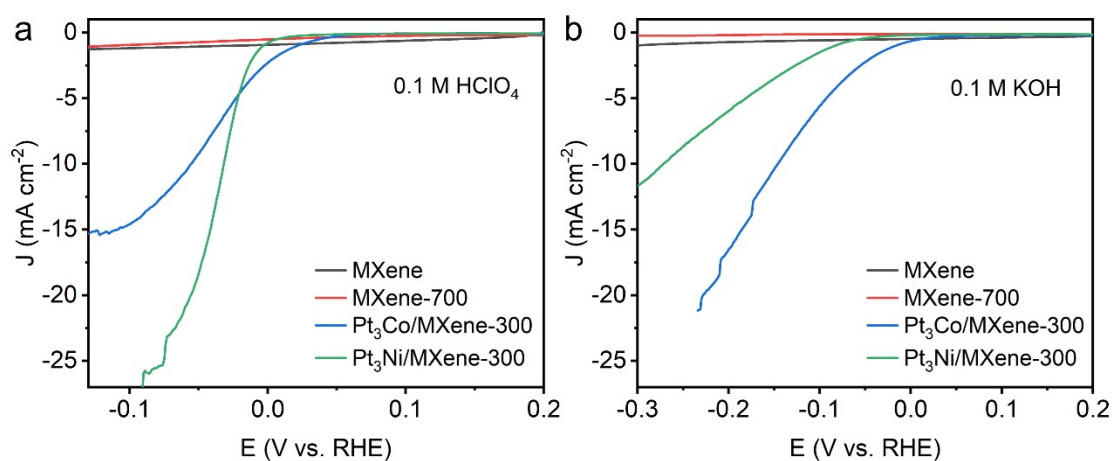

**Fig. S11** The HER performance of MXene, MXene-700, Pt<sub>3</sub>M/MXene-300 (M = Co, Ni) in (a) 0.1 M HClO<sub>4</sub> and (b) 0.1 M KOH.

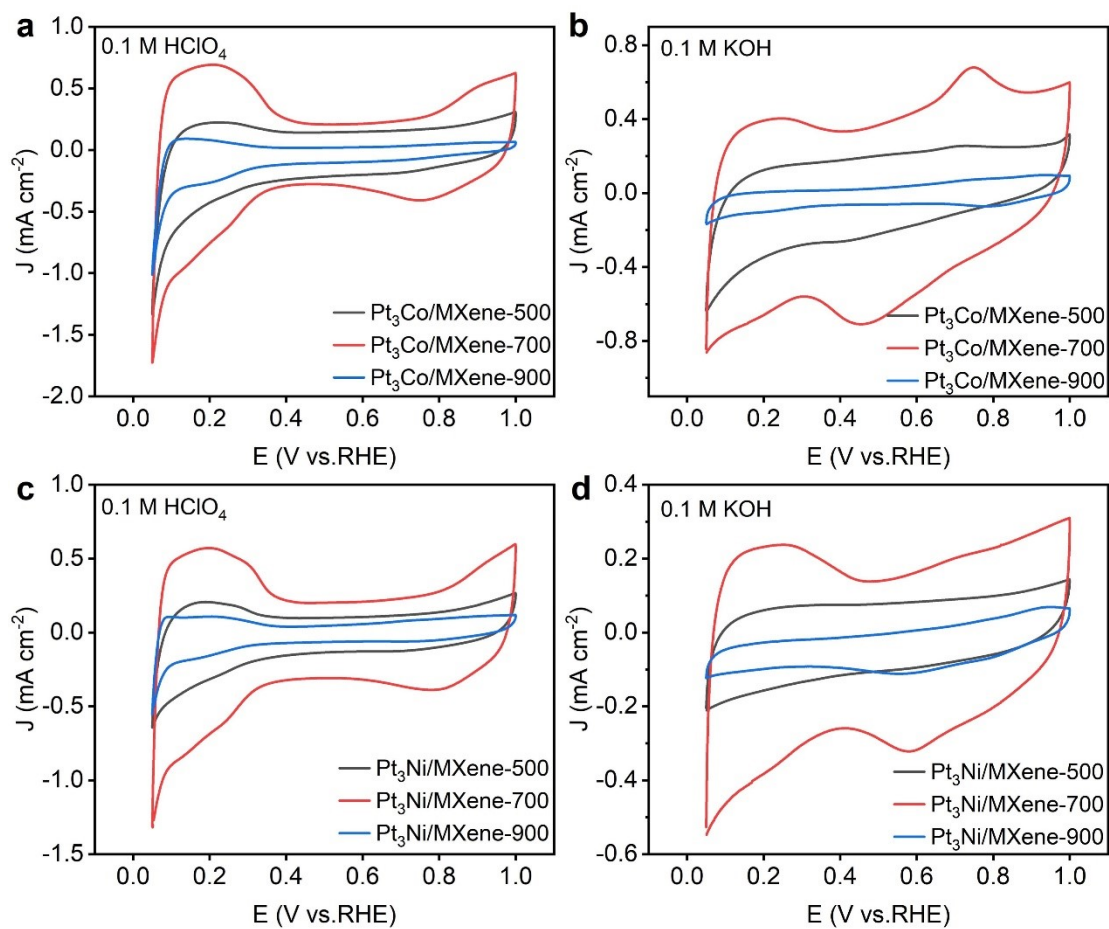

**Fig. S12** CV curves in (a) 0.1 M HClO<sub>4</sub> and (b) 0.1 M KOH of Pt<sub>3</sub>Co/MXene catalysts; CV curves in (c) 0.1 M HClO<sub>4</sub> and (d) 0.1 M KOH of Pt<sub>3</sub>Ni/MXene catalysts.

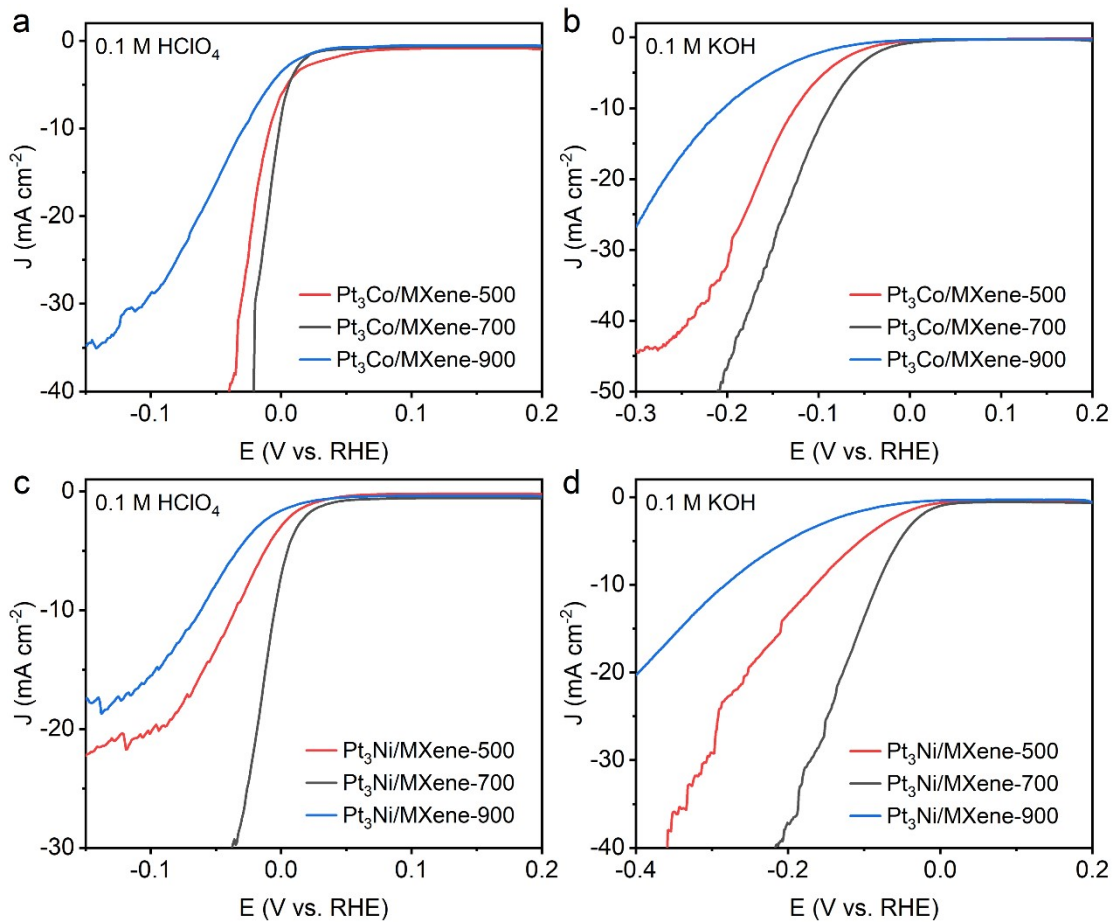

**Fig. S13** (a, b) HER performance of Pt<sub>3</sub>Co/MXene-500, 700, 900 catalysts in 0.1 M HClO<sub>4</sub> and 0.1 M KOH, (c, d) HER performance of Pt<sub>3</sub>Ni/MXene-500, 700, 900 catalysts in 0.1 M HClO<sub>4</sub> and 0.1 M KOH.

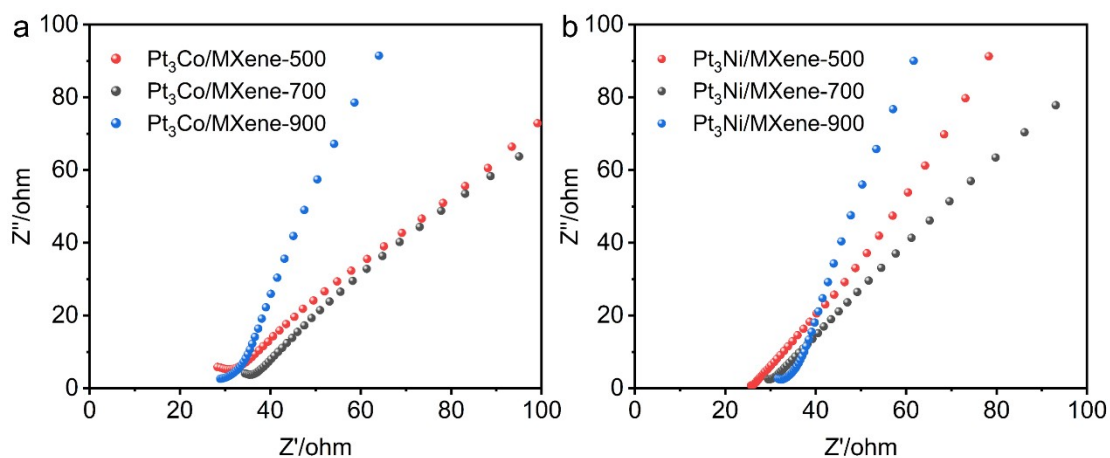

**Fig. S14** Nyquist plots of Pt<sub>3</sub>M/MXene-500, 700, 900 (M = Co, Ni) in 0.1 M HClO<sub>4</sub>.



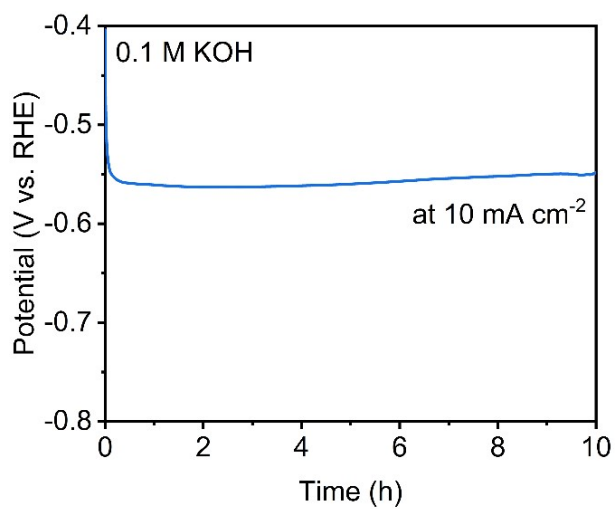

**Fig. S15** Chronopotentiometric curve of Pt<sub>3</sub>Co/MXene-700 measured at 10 mA cm<sup>-2</sup> in 0.1 M KOH.

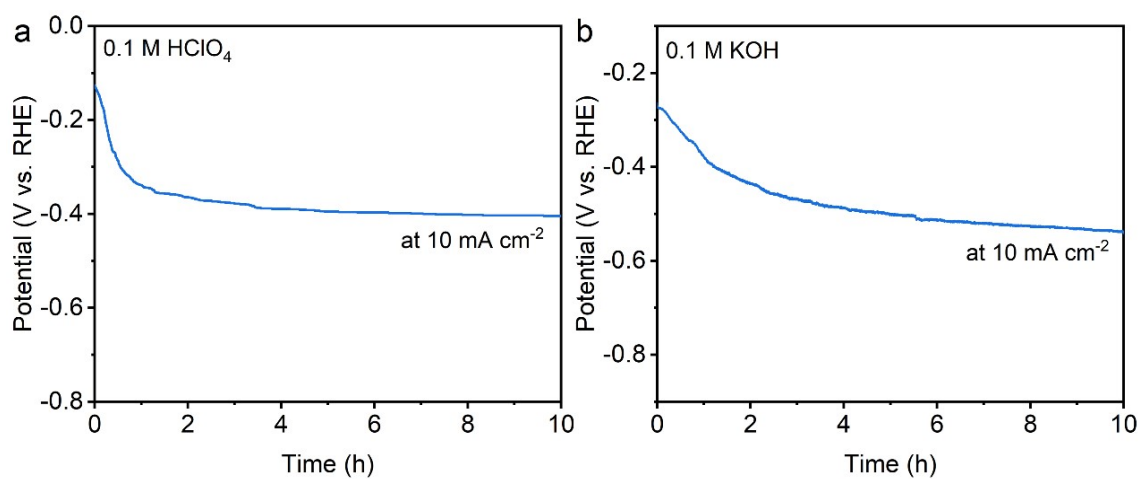

**Fig. S16** Chronopotentiometric curve of Pt<sub>3</sub>Ni/MXene-700 measured at 10 mA cm<sup>-2</sup> in 0.1 M HClO<sub>4</sub> and KOH.

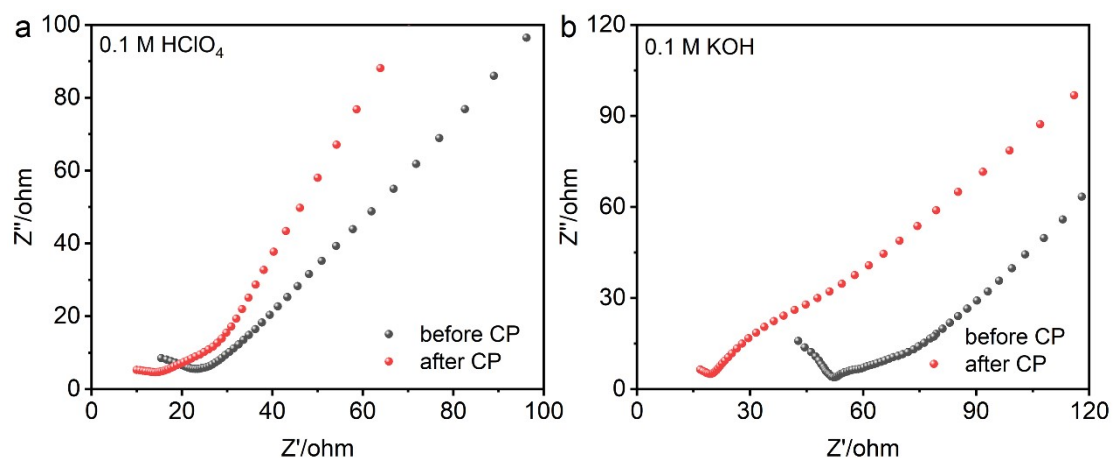

**Fig. S17** Nyquist plots of Pt<sub>3</sub>Co/MXene-700 before and after stability testing in 0.1 M HClO<sub>4</sub> and 0.1 M KOH.

**Table S1.** The degree of Pt shrinkage in Pt alloys of Pt<sub>3</sub>Co/MXene-700 and Pt<sub>3</sub>Ni/MXene-700 catalysts.

| <b>Catalysts</b>             | <b>a=b=c</b> | <b>Degree of lattice contraction</b> |
|------------------------------|--------------|--------------------------------------|
| Pt                           | 3.92         | \                                    |
| Pt <sub>3</sub> Co/MXene-700 | 3.878        | 10.71%                               |
| Pt <sub>3</sub> Ni/MXene-700 | 3.911        | 2.3%                                 |

**Table S2.** Comparison of the ORR performance of recent reported catalysts in 0.1 M HClO<sub>4</sub> (H) and 0.1 M KOH (OH) solution.

| <b>Catalysts</b>                        | <b><math>E_{1/2}</math> (H)<br/>(vs. RHE)</b> | <b>Tafel<br/>slope</b> | <b><math>E_{1/2}</math> (OH)<br/>(vs. RHE)</b> | <b>Tafel<br/>slope</b> | <b>Ref.</b> |
|-----------------------------------------|-----------------------------------------------|------------------------|------------------------------------------------|------------------------|-------------|
| Pt <sub>3</sub> Co/MXene-700            | 0.897 V                                       | 88.77                  | 0.901 V                                        | 69.89                  | This work   |
| Pt <sub>3</sub> Ni/MXene-700            | 0.889 V                                       | 104.22                 | 0.897 V                                        | 91                     | This work   |
| Pt/MXene                                | 0.892 V                                       | 95.82                  | \                                              | \                      | 1           |
| Fe-N-C@MXene                            | 0.777 V                                       | 78                     | 0.887 V                                        | 88                     | 2           |
| TiCN-BCN-Co                             | \                                             | \                      | 0.81 V                                         | 90.8                   | 3           |
| NiCo-LDH/Ti <sub>3</sub> C <sub>2</sub> | \                                             | \                      | 0.66 V                                         | 90                     | 4           |
| MnCo <sub>2</sub> O <sub>4</sub> /      | \                                             | \                      | 0.876 V                                        | 63                     | 5           |
| NGQD/MXene                              |                                               |                        |                                                |                        |             |
| Fe/Co-                                  | \                                             | \                      | 0.85 V                                         | 76                     | 6           |
| CNT@MXene                               |                                               |                        |                                                |                        |             |
| PtNi/NC                                 | \                                             | \                      | 0.82 V                                         | 80.5                   | 7           |
| Co/Co <sub>3</sub> O <sub>4</sub> @C    | 0.823 V                                       | 85.8                   | 0.672 V                                        | 100.4                  | 8           |
| Pt <sub>5A</sub> -PtCo NCs/N-           | 0.89 V                                        | \                      | 0.86 V                                         | 74                     | 9           |
| CNT-900                                 |                                               |                        |                                                |                        |             |
| Pt <sub>4</sub> Co@NC-900               | 0.88 V                                        | 68                     | \                                              | \                      | 10          |
| PtCoNG-3500-                            | 0.86 V                                        | \                      | \                                              | \                      | 11          |
| 600/900                                 |                                               |                        |                                                |                        |             |
| PtCu HNF                                | 0.87 V                                        | 78.8                   | \                                              | \                      | 12          |
| Co/CeO <sub>2</sub>                     | \                                             | \                      | 0.75 V                                         | 80                     | 13          |

**Table S3.** Comparison of the HER performance of recent reported catalysts in 0.1 M HClO<sub>4</sub> (H) and 0.1 M KOH (OH) solution.

| Catalysts                                             | Overpotential<br>( $\eta_{10}$ , H) | Tafel<br>slope | Overpotential<br>( $\eta_{10}$ , OH) | Tafel<br>slope | Ref.         |
|-------------------------------------------------------|-------------------------------------|----------------|--------------------------------------|----------------|--------------|
| Pt <sub>3</sub> Co/MXene-700                          | 1.2                                 | 27.11          | 82.5                                 | 76.01          | This<br>work |
| Pt <sub>3</sub> Ni/MXene-700                          | 4.6                                 | 36.78          | 88.3                                 | 76.12          | This<br>work |
| Pt/Ti <sub>3</sub> C <sub>2</sub> T <sub>x</sub> -550 | 32.7                                | 32.3           | \                                    | \              | 14           |
| IrCo <sub>0.14</sub>                                  | 16                                  | 28.8           | \                                    | \              | 15           |
| IrCo <sub>0.65</sub>                                  | 17                                  | 35.3           | \                                    | \              | 16           |
| Pd/OMC                                                | 167                                 | 68             | \                                    | \              | 17           |
| Pt@PDG4                                               | \                                   | \              | 55                                   | 79.2           | 18           |
| MoS <sub>2</sub> -CoNi(OH) <sub>2</sub>               | \                                   | \              | 178                                  | 60.9           | 19           |
| Co/NGC-3                                              | \                                   | \              | 293                                  | 130            | 20           |
| CMCO NWs                                              | 140                                 | 39             | \                                    | \              | 21           |
| NiS <sub>2</sub> /PtNi NWs                            | 15                                  | 20             | \                                    | \              | 22           |
| Pd/OMC                                                | 167                                 | 62             | \                                    | \              | 23           |

## References

- 1 Z. Zhang, C. Liu, Y. Dai, B. Liu, P. Guo, F. Tu, M. Ma, L. Shen, Z. Zhao, Y. Liu, Y. Zhang, L. Zhao and Z. Wang, *ACS Appl. Energy Mater.*, 2022, **5**, 14957–14965.
- 2 W.T. Wang, N. Batool, T. H. Zhang, J. Liu, X. F. Han, J. H. Tian and R. Yang, *J. Mater. Chem. A*, 2021, **9**, 3952–3960.
- 3 Y. Wang, F. Gu, L. Cao, L. Fan, T. Hou, Q. Zhu, Y. Wu and S. Xiong, *Int J Hydrogen Energy*, 2022, **47**, 20894–20904.
- 4 G. L. Li, S. Cao, Z. F. Lu, X. Wang, Y. Yan and C. Hao, *Appl. Surf. Sci.*, 2022, **591**, 153142.
- 5 M. Faraji, S. Yousefzadeh, M. F. Nassar and M. M. A. Zahra, *J. Alloy Compd.*, 2022, **927**, 167115.
- 6 C. Zhang, H. Dong, B. Chen, T. Jin, J. Nie and G. Ma, *Carbon*, 2021, **185**, 17–26.
- 7 X. Chen, J. Guo, J. Liu, Z. Luo, X. Zhang, D. Qian, D. Sun-Waterhouse and G. I. N. Waterhouse, *J. Phys. Chem. Lett.*, 2023, **14**, 1740–1747.
- 8 Q. Zhang, X. Zhao, X. Miao, W. Yang, C. Wang and Q. Pan, *Int. J. Hydrogen Energy*, 2020, **45**, 33028–33036.
- 9 W. Chen, X. Zhu, W. Wei, H. Chen, T. Dong, R. Wang, M. Liu, K. (Ken) Ostrikov, P. Peng and S. Zang, *Small*, 2023, 2304294.
- 10 N. Zhou and Y. Li, *Int. J. Hydrogen Energy*, 2021, **46**, 37884–37894.
- 11 L. Sun, Y. Qin and Y. Yin, *J. Power Sources*, 2023, **562**, 232758.
- 12 G. Ma, X. Zhao, J. Wang, G. Qin, Z. Lu, X. Yu, L. Li, X. Zhang and X. Yang, *J. Electroanal. Chem.*, 2022, **922**, 116756.

- 13 Z. Liu, J. Wan, M. Li, Z. Shi, J. Liu and Y. Tang, *Nanoscale*, 2022, **14**, 1997–2003.
- 14 Z. Li, Z. Qi, S. Wang, T. Ma, L. Zhou, Z. Wu, X. Luan, F. Y. Lin, M. Chen, J. T. Miller, H. Xin, W. Huang and Y. Wu, *Nano Lett.*, 2019, **19**, 5102–5108.
- 15 W. Gao, Q. Xu, Z. Wang, M. Wang, X. Ren, G. Yuan and Q. Wang, *Electrochim. Acta*, 2020, **337**, 135738.
- 16 L. Fu, X. Zeng, G. Cheng and W. Luo, *ACS Appl. Mater. Interfaces*, 2018, **10**, 24993–24998.
- 17 J. G. Kim, B. Lee, N. N. T. Pham, S. G. Lee and C. Pak, *J. Ind. Eng. Chem.*, 2020, **89**, 361–367.
- 18 Z. Li, F. Han, Z. Liu, Q. Peng, Q. D. Wang, M. Sun and G. J. Kang, *New J. Chem.*, 2021, **45**, 21670–21675.
- 19 Y. Zhang, L. Xue, C. Liang, Y. Chen, J. Liu, C. Shen, Q. Li, Y. Duan, L. Yao, H. Zhang, Y. Cai, C. Tan and Z. Luo, *Appl. Surf. Sci.*, 2021, **561**, 150079.
- 20 J. Li, Y. Kang, D. Liu, Z. Lei and P. Liu, *ACS Appl. Mater. Interfaces*, 2020, **12**, 5717–5729.
- 21 Q. Li, K. Liu, S. Gui, J. Wu, X. Li, Z. Li, H. Jin, H. Yang, Z. Hu, W. Liang and L. Huang, *Nano Res.*, 2022, **15**, 2870–2876.
- 22 G. Wang, X. Huang, H. G. Liao and S. G. Sun, *Energ. Fuel.*, 2021, **8**, 6928–6934.
- 23 J. G. Kim, B. Lee, N. N. T. Pham, S. G. Lee and C. Pak, *J. Ind. Eng. Chem.*, 2020, **89**, 361–367.
